# Supplementary material for: Sodium insertion in carboxylate based materials and their application in 3.6 V full sodium cells
Source: Royal Society of Chemistry journal article supplement (doi:10.1039/c2ee22864e), 2012-01-01
Supplement: c2ee22864e.pdf [file c2ee22864e.pdf]

Cite this: DOI: 10.1039/c0xx00000x

www.rsc.org/xxxxxx

### Supporting Information

for *Energy & Environmental Science*, DOI: 10.1039/c0xx00000x

## Sodium insertion in carboxylate based materials and their application in 3.6 V full sodium cells

Ali Abouimrane\*, Wei Weng, Hussameldin Eltayeb, Yanjie Cui, Jens Niklas, Oleg Poluektov, and Khalil Amine\*

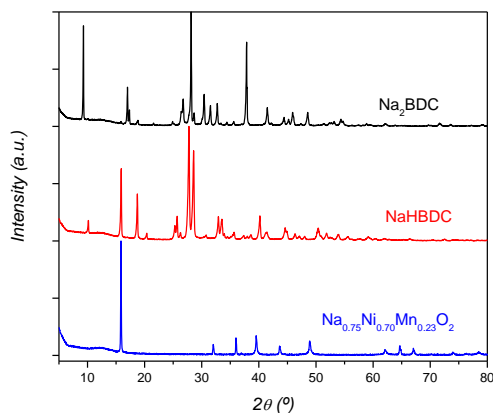

**Figure S1.** XRD of Na<sub>2</sub>BDC, NaHBDC and Na<sub>0.75</sub>Mn<sub>0.7</sub>Ni<sub>0.23</sub>O<sub>2</sub> pristine materials.

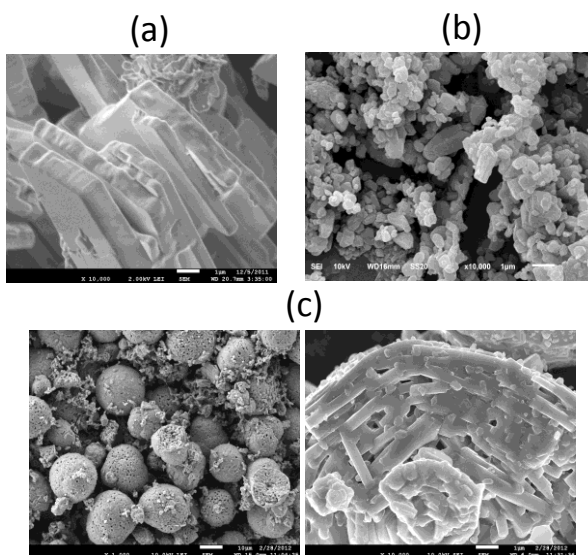

**Figure S2.** SEM pictures of Na<sub>2</sub>BDC (a), NaHBDC (b) and Na<sub>0.75</sub>Mn<sub>0.7</sub>Ni<sub>0.23</sub>O<sub>2</sub> (c). For Na<sub>0.75</sub>Mn<sub>0.7</sub>Ni<sub>0.23</sub>O<sub>2</sub> material, SEM images shows the formation of ~ 20 μm particle size spherical secondary particles.

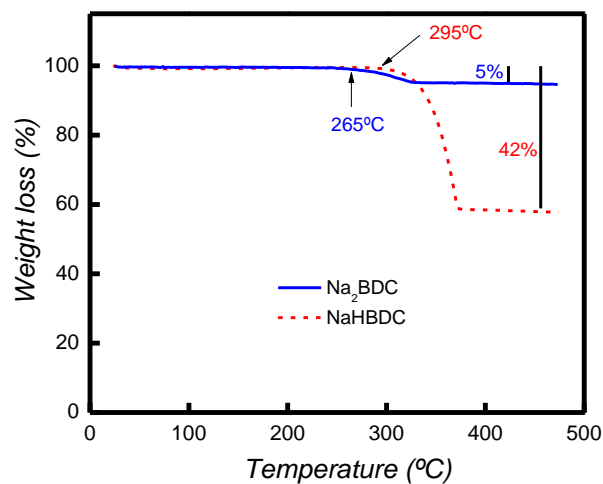

**Figure S3.** TGA of Na<sub>2</sub>BDC, and NaHBDC showing good thermal stability until ~ 480°C for Na<sub>2</sub>BDC and until ~ 300°C for NaHBDC.

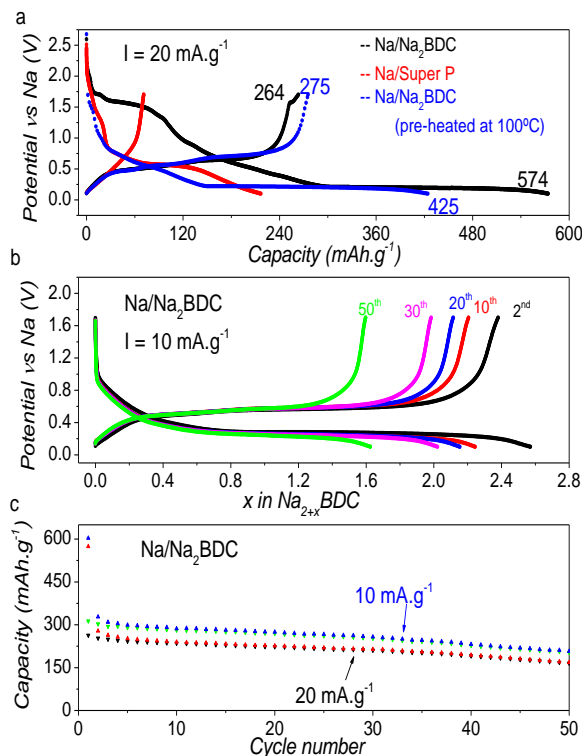

10 **Figure S4.** Voltage profile and capacity retention of Na/Na<sub>2</sub>BDC cell for 50 cycles under 10 and 20 mA/g current density.

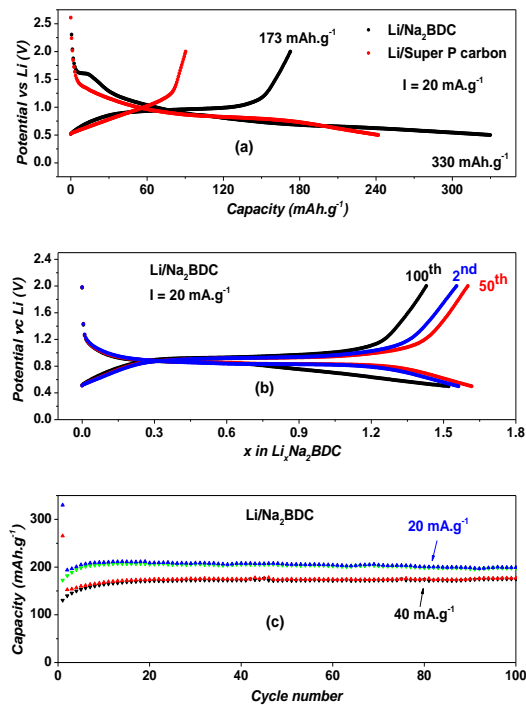

**Figure S5.** Voltage profile and capacity retention of Li/Na<sub>2</sub>BDC cell for 100 cycles under 20 and 40 mA/g current density showing good cycleability.

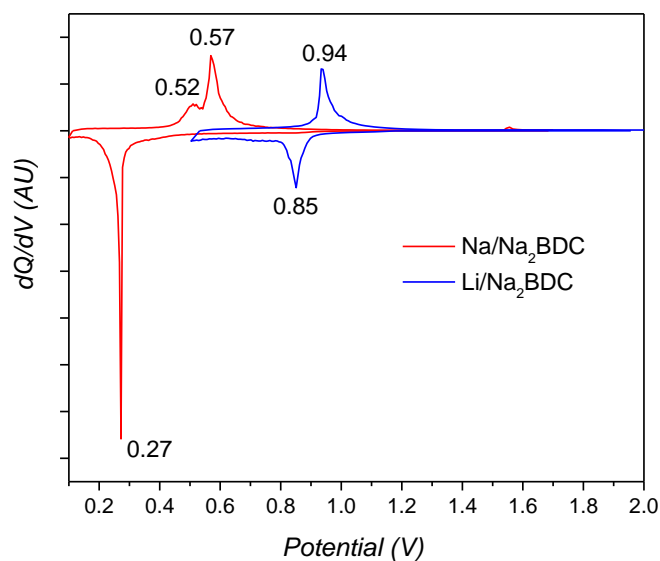

**Figure S6.** 2<sup>nd</sup> cycle dQ/dV curves of Na/Na<sub>2</sub>BDC and Li/Na<sub>2</sub>BDC systems under 20 mA/g current density.

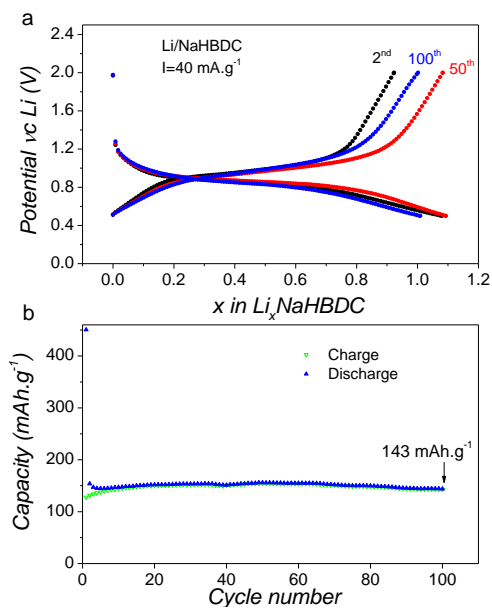

5

**Figure S7.** Voltage profile and capacity retention of Li/NaHBDC cell for 100 cycles under 40 mA/g current density.

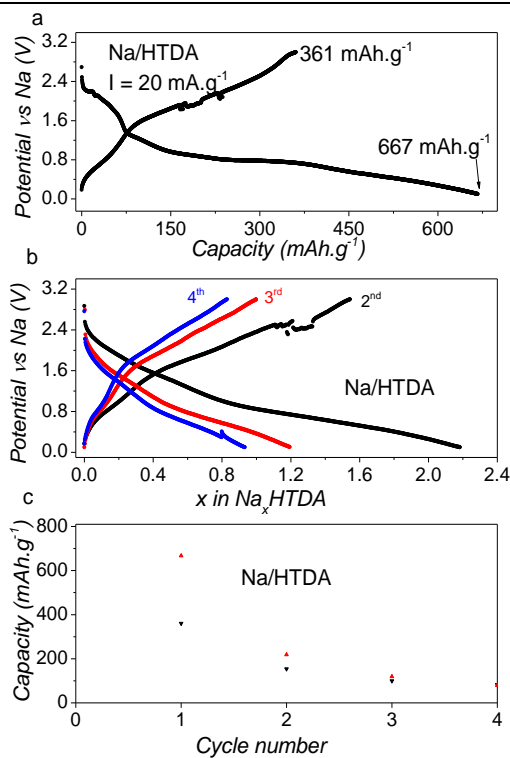

10 **Figure S8.** Voltage profile and Capacity retention of Na/HTDA half-cell showing poor cycleability.

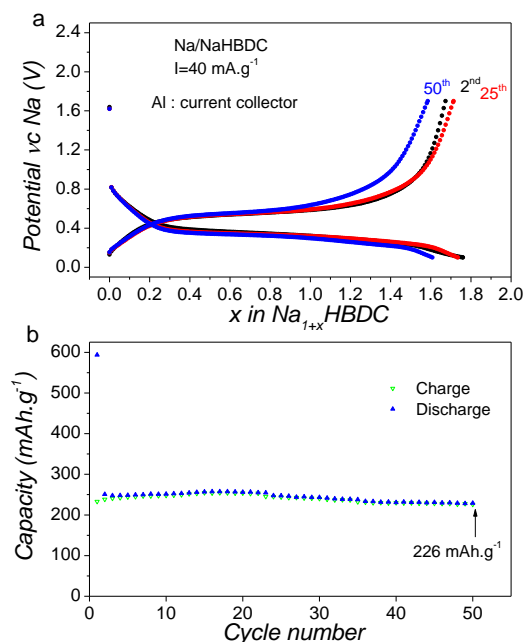

**Figure S9.** (a) Voltage profile and (b) Capacity retention of Na/NaHBDC half-cell for 50 cycles under the current rate of  $40 \text{ mA.g}^{-1}$  between 0.1V and 1.7V demonstrates that this anode can be cycled using Al current collector contrary to lithium batteries as no Al-Na was predicted by their phase diagram.
